# Supplementary material for: Inflammatory Dietary Pattern Predicts Dyslipidemia and Anemia in Middle-Aged and Older Taiwanese Adults with Declined Kidney Function: A Cross-Sectional Population Study from 2008 to 2010
Source: MDPI journal article supplement (doi:10.3390/nu11092052), 2019-09-02
Supplement: s1 [file s1]

# Inflammatory Dietary Pattern Predicts Dyslipidemia and Anemia in Middle-aged and Older Taiwanese Adults with Declined Kidney Function: A Cross-Sectional Population Study from 2008 to 2010

Adi Lukas Kurniawan <sup>1</sup>, Chien-Yeh Hsu <sup>2,3</sup>, Hsiao-Hsien Rau <sup>4</sup>, Li-Yin Lin<sup>1</sup>, and Jane C-J Chao <sup>1,3,5\*</sup>

**Table S1.** Characteristics of the study participants across genders (*n* = 41,128) <sup>a</sup>.

|                                     | Total<br>( <i>n</i> = 41,128) | Males<br>( <i>n</i> = 21,376) | Females<br>( <i>n</i> = 19,752) | <i>p</i> <sup>b</sup> |
|-------------------------------------|-------------------------------|-------------------------------|---------------------------------|-----------------------|
| Age (years)                         | 52.6 ± 9.9                    | 51.9 ± 0.1                    | 53.3 ± 0.1                      | <0.001                |
| Smoking, current                    | 6717 (17.0)                   | 6086 (28.5)                   | 631 (3.2)                       | <0.001                |
| Alcohol drinking, yes               | 6420 (17.0)                   | 5405 (25.3)                   | 1015 (5.1)                      | <0.001                |
| Physical inactivity                 | 24726 (60.1)                  | 12554 (58.7)                  | 12172 (61.6)                    | <0.001                |
| Sleep duration                      |                               |                               |                                 | <0.001                |
| <6 hours/day                        | 10575 (25.7)                  | 4828 (22.6)                   | 5747 (29.1)                     |                       |
| >7 hours/day                        | 9707 (23.6)                   | 5325 (24.9)                   | 4382 (22.2)                     |                       |
| Family income                       |                               |                               |                                 | <0.001                |
| <800,000 NTD                        | 16891 (41.1)                  | 7395 (34.6)                   | 9496 (48.1)                     |                       |
| >1.61 M NTD                         | 6481 (15.8)                   | 4036 (18.9)                   | 2445 (12.4)                     |                       |
| Education                           |                               |                               |                                 | <0.001                |
| < high school                       | 10215 (24.8)                  | 3583 (16.8)                   | 6632 (33.6)                     |                       |
| > high school                       | 12697 (30.9)                  | 8150 (38.1)                   | 4547 (23.0)                     |                       |
| Marital status, married             | 32286 (78.5)                  | 18412 (86.1)                  | 13874 (70.2)                    | <0.001                |
| Cardiovascular disease <sup>c</sup> | 2489 (6.1)                    | 1298 (6.1)                    | 1191 (6.0)                      | 0.86                  |
| Diabetes <sup>d</sup>               | 3974 (9.7)                    | 2356 (11.0)                   | 1618 (8.2)                      | <0.001                |
| Hypertension <sup>e</sup>           | 11779 (28.6)                  | 6762 (31.6)                   | 5017 (25.4)                     | <0.001                |
| Dyslipidemia                        | 12909 (32.0)                  | 7967 (37.3)                   | 4942 (25.0)                     | <0.001                |
| Anemia                              | 3232 (7.9)                    | 684 (3.2)                     | 2548 (12.9)                     | <0.001                |
| BMI (kg/m <sup>2</sup> )            | 24.0 ± 3.3                    | 24.7 ± 3.1                    | 23.2 ± 3.4                      | <0.001                |
| SBP (mmHg)                          | 122.5 ± 18.2                  | 124.7 ± 16.7                  | 120.1 ± 19.4                    | <0.001                |
| DBP (mmHg)                          | 73.8 ± 11.8                   | 76.9 ± 11.2                   | 70.6 ± 11.5                     | <0.001                |
| Inflammatory markers                |                               |                               |                                 |                       |
| Leukocytes (×10 <sup>3</sup> /μL)   | 5.9 ± 1.7                     | 6.1 ± 1.6                     | 5.6 ± 1.7                       | <0.001                |
| Neutrophils (×10 <sup>3</sup> /μL)  | 3.3 ± 1.3                     | 3.4 ± 1.2                     | 3.2 ± 1.4                       | <0.001                |
| Lymphocytes (×10 <sup>3</sup> /μL)  | 1.9 ± 0.6                     | 2.0 ± 0.6                     | 1.8 ± 0.6                       | <0.001                |
| N/L ratio                           | 1.8 ± 0.9                     | 1.9 ± 0.9                     | 1.8 ± 0.9                       | <0.001                |
| CRP (nmol/L)                        | 22.5 ± 47.9                   | 22.8 ± 46.9                   | 21.6 ± 47.9                     | <0.001                |

| Blood sugar and lipids             |              |              |              |        |
|------------------------------------|--------------|--------------|--------------|--------|
| FBG (mmol/L)                       | 5.9 ± 1.3    | 6.0 ± 1.3    | 5.8 ± 1.3    | <0.001 |
| TG (mmol/L)                        | 1.4 ± 1.1    | 1.5 ± 0.8    | 1.2 ± 0.7    | <0.001 |
| TC (mmol/L)                        | 5.3 ± 0.9    | 5.2 ± 0.9    | 5.3 ± 0.9    | <0.001 |
| HDL-C (mmol/L)                     | 1.5 ± 0.4    | 1.4 ± 0.3    | 1.7 ± 0.4    | <0.001 |
| LDL-C (mmol/L)                     | 3.1 ± 0.8    | 3.2 ± 0.8    | 3.1 ± 0.8    | <0.001 |
| TC/HDL-C ratio                     | 3.6 ± 0.9    | 4.0 ± 0.9    | 3.3 ± 0.8    | <0.001 |
| Anemic biomarkers                  |              |              |              |        |
| RBC (×10 <sup>6</sup> /μL)         | 4.7 ± 0.5    | 5.0 ± 0.5    | 4.5 ± 0.4    | <0.001 |
| Hemoglobin (g/dL)                  | 14.2 ± 1.5   | 15.1 ± 1.1   | 13.1 ± 1.2   | <0.001 |
| Hematocrit (%)                     | 42.2 ± 4.3   | 44.9 ± 3.2   | 39.2 ± 3.2   | <0.001 |
| MCV (fL)                           | 88.7 ± 6.6   | 89.4 ± 6.2   | 88.0 ± 7.0   | <0.001 |
| MCH (pg)                           | 29.9 ± 2.6   | 30.1 ± 2.5   | 29.6 ± 2.8   | <0.001 |
| MCHC (g/dL)                        | 33.6 ± 0.8   | 33.7 ± 0.7   | 33.6 ± 0.8   | <0.001 |
| RDW (%)                            | 13.9 ± 1.3   | 14.0 ± 1.1   | 13.9 ± 1.5   | <0.001 |
| Iron (μg/dL)                       | 93.1 ± 35.3  | 101.9 ± 35.3 | 84.3 ± 33.0  | <0.001 |
| Kidney function biomarkers         |              |              |              |        |
| BUN (mmol/L)                       | 5.2 ± 1.5    | 5.4 ± 1.5    | 5.0 ± 1.5    | <0.001 |
| CRE (μmol/L)                       | 89.5 ± 22.2  | 101.0 ± 20.8 | 77.4 ± 18.7  | <0.001 |
| eGFR (mL/min/1.73 m <sup>2</sup> ) | 73.7 ± 9.9   | 73.7 ± 9.8   | 74.1 ± 9.9   | <0.001 |
| Proteinuria                        |              |              |              | <0.001 |
| +1                                 | 39311 (95.6) | 20260 (94.8) | 19051 (96.5) |        |
| +2                                 | 1041 (2.5)   | 641 (3.0)    | 400 (2.0)    |        |
| ≥+3                                | 776 (1.9)    | 475 (2.2)    | 301 (1.5)    |        |

NTD: new Taiwan dollar, BMI: body mass index, SBP: systolic blood pressure, DBP: diastolic blood pressure, N/L, neutrophil-to-lymphocyte; CRP: C-reactive protein, FBG: fasting blood glucose, TG: triglycerides, TC: total cholesterol, HDL-C: high-density lipoprotein cholesterol, LDL-C: low-density lipoprotein cholesterol, TC/HDL-C: total cholesterol-to-high-density lipoprotein cholesterol, RBC: red blood cells, MCV: mean corpuscular volume, MCH: mean corpuscular hemoglobin, MCHC: mean corpuscular hemoglobin concentration, RDW: red blood cell distribution width, BUN: blood urea nitrogen, CRE: creatinine, eGFR: estimated glomerular filtration rate. <sup>a</sup> continuous data are presented as mean ± SD and categorical data are presented as number (percentage). <sup>b</sup> *p*-values were analyzed using Mann-Whitney U test for continuous variables and chi-square test for categorical variables. <sup>c</sup> cardiovascular disease: having a history of cardiovascular disease or use of cardiovascular drug. <sup>d</sup> diabetes: having a history of diabetes, use of hypoglycemic drug or FBG ≥7.0 mmol/L (126 mg/dL). <sup>e</sup> hypertension: having a history of hypertension, use of hypertension drug, systolic pressure ≥140 mmHg or diastolic pressure ≥90 mmHg.

**Table S2.** Multivariate logistic regression analysis of dietary pattern scores across quartiles with proteinuria severity.

| Dietary Pattern Scores | Model 1 <sup>a</sup> |          | Model 2 <sup>b</sup> |          |
|------------------------|----------------------|----------|----------------------|----------|
|                        | OR (95% CI)          | <i>p</i> | OR (95%CI)           | <i>p</i> |
| Males                  |                      |          |                      |          |

| Q1 (ref)      | 1                 |        | 1                 |       |
|---------------|-------------------|--------|-------------------|-------|
| Q2 (mild)     | 1.26 (1.04, 1.51) | 0.02   | 1.23 (0.97, 1.56) | 0.09  |
| Q3 (moderate) | 1.20 (1.00, 1.45) | 0.05   | 1.27 (1.01, 1.61) | 0.044 |
| Q4 (high)     | 1.47 (1.23, 1.76) | <0.001 | 1.44 (1.14, 1.83) | 0.002 |
| Females       |                   |        |                   |       |
| Q1 (ref)      | 1                 |        | 1                 |       |
| Q2 (mild)     | 1.12 (0.91, 1.38) | 0.29   | 1.06 (0.81, 1.39) | 0.69  |
| Q3 (moderate) | 1.32 (1.07, 1.63) | 0.009  | 1.30 (0.99, 1.71) | 0.06  |
| Q4 (high)     | 1.31 (1.04, 1.65) | 0.02   | 1.30 (0.97, 1.75) | 0.08  |

<sup>a</sup> model 1 adjusted for age and BMI. <sup>b</sup> model 2 adjusted for model 1 variables, smoking, alcohol drinking, physical activity, sleep duration, family income, education, marital status, cardiovascular disease, diabetes, and hypertension. Proteinuria severity was analyzed as a dummy variable with +1 served as a reference.

**Table S3.** Multivariate linear regression analysis of N/L ratio with kidney function biomarkers.

| Dependent Variables                | Model 1 <sup>a</sup> |          | Model 2 <sup>b</sup> |          |
|------------------------------------|----------------------|----------|----------------------|----------|
|                                    | $\beta$ (95% CI)     | <i>p</i> | $\beta$ (95%CI)      | <i>p</i> |
| Males                              |                      |          |                      |          |
| CRP (nmol/L)                       | 10.17 (9.40, 10.93)  | <0.001   | 9.98 (9.08, 10.88)   | <0.001   |
| BUN (mmol/L)                       | 0.05 (0.03, 0.07)    | <0.001   | 0.04 (0.01, 0.06)    | 0.003    |
| CRE ( $\mu$ mol/L)                 | 1.11 (0.81, 1.41)    | <0.001   | 0.96 (0.62, 1.30)    | <0.001   |
| eGFR (mL/min/1.73 m <sup>2</sup> ) | -0.36 (-0.50, -0.22) | <0.001   | -0.31 (-0.47, -0.16) | <0.001   |
| Females                            |                      |          |                      |          |
| CRP (nmol/L)                       | 13.14 (12.35, 13.94) | <0.001   | 12.20 (11.33, 13.08) | <0.001   |
| BUN (mmol/L)                       | 0.01 (-0.02, 0.03)   | 0.506    | 0.00 (-0.02, 0.03)   | 0.816    |
| CRE ( $\mu$ mol/L)                 | 1.14 (0.85, 1.43)    | <0.001   | 1.03 (0.70, 1.37)    | <0.001   |
| eGFR (mL/min/1.73 m <sup>2</sup> ) | -0.30 (-0.45, -0.16) | <0.001   | -0.20 (-0.37, -0.02) | 0.028    |

CRP: C-reactive protein, BUN: blood urea nitrogen, CRE: creatinine, eGFR: estimated glomerular filtration rate. <sup>a</sup> model 1 adjusted for age and BMI. <sup>b</sup> model 2 adjusted for model 1 variables, smoking, alcohol drinking, physical activity, sleep duration, family income, education, marital status, cardiovascular disease, diabetes, and hypertension.

**Table S4.** Intake frequency of the food groups by different genders ( $n = 41,128$ ) <sup>a</sup>.

| Food Groups                                  | Males ( $n = 21,376$ ) | Females ( $n = 19,752$ ) | $p$    |
|----------------------------------------------|------------------------|--------------------------|--------|
| Bread <sup>b</sup>                           | 1601 (7.5)             | 1605 (8.1)               | 0.017  |
| Whole grains <sup>b</sup>                    | 3323 (15.5)            | 2961 (15.0)              | 0.12   |
| Beans/legumes <sup>b</sup>                   | 1901 (8.9)             | 1888 (9.6)               | 0.02   |
| Seafood <sup>b</sup>                         | 2192 (10.3)            | 1862 (9.4)               | 0.005  |
| Eggs <sup>b</sup>                            | 2098 (9.8)             | 987 (5.0)                | <0.001 |
| Meat <sup>b</sup>                            | 5724 (26.8)            | 3644 (18.4)              | <0.001 |
| Organ meats <sup>b</sup>                     | 86 (0.4)               | 44 (0.2)                 | 0.002  |
| Dairy products <sup>b</sup>                  | 476 (2.2)              | 612 (3.1)                | <0.001 |
| Deep fried foods <sup>b</sup>                | 677 (3.2)              | 590 (3.0)                | 0.30   |
| Fried rice/flour products <sup>b</sup>       | 733 (3.4)              | 690 (3.5)                | 0.73   |
| Instant noodles <sup>b</sup>                 | 30 (0.1)               | 14 (0.1)                 | 0.035  |
| Preserved/processed foods <sup>b</sup>       | 155 (0.7)              | 118 (0.6)                | 0.12   |
| Dipping sauce <sup>b</sup>                   | 616 (2.9)              | 417 (2.1)                | <0.001 |
| Jam/honey <sup>b</sup>                       | 602 (2.8)              | 524 (2.7)                | 0.32   |
| Rice/flour products <sup>c</sup>             | 1393 (6.5)             | 392 (2.0)                | <0.001 |
| Fruits <sup>c</sup>                          | 535 (2.5)              | 571 (2.9)                | <0.001 |
| Root crops <sup>d</sup>                      | 453 (2.1)              | 561 (2.8)                | <0.001 |
| Dark-colored vegetables <sup>e</sup>         | 1207 (5.6)             | 1548 (7.8)               | <0.001 |
| Light-colored vegetables <sup>e</sup>        | 1519 (7.1)             | 1651 (8.4)               | 0.016  |
| Fried vegetables/salad dressing <sup>e</sup> | 494 (2.3)              | 638 (3.2)                | <0.001 |
| Milk <sup>f</sup>                            | 2317 (10.8)            | 2574 (13.0)              | <0.001 |
| Sugary drinks <sup>f</sup>                   | 3535 (16.5)            | 2705 (13.7)              | <0.001 |

<sup>a</sup> Data are expressed as number (percentage). The number of the participants was shown for those who consumed the food group at least the 4th high intake frequency in 5 different frequency options in the food frequency questionnaire. <sup>b</sup> consumed  $\geq 1$  serving/day. <sup>c</sup> consumed  $\geq 3$  servings/day. <sup>d</sup> consumed  $\geq \frac{1}{2}$  bowl/day. <sup>e</sup> consumed  $\geq 1\frac{1}{2}$  bowls/day. <sup>f</sup> consumed  $\geq 1$  cup/day.

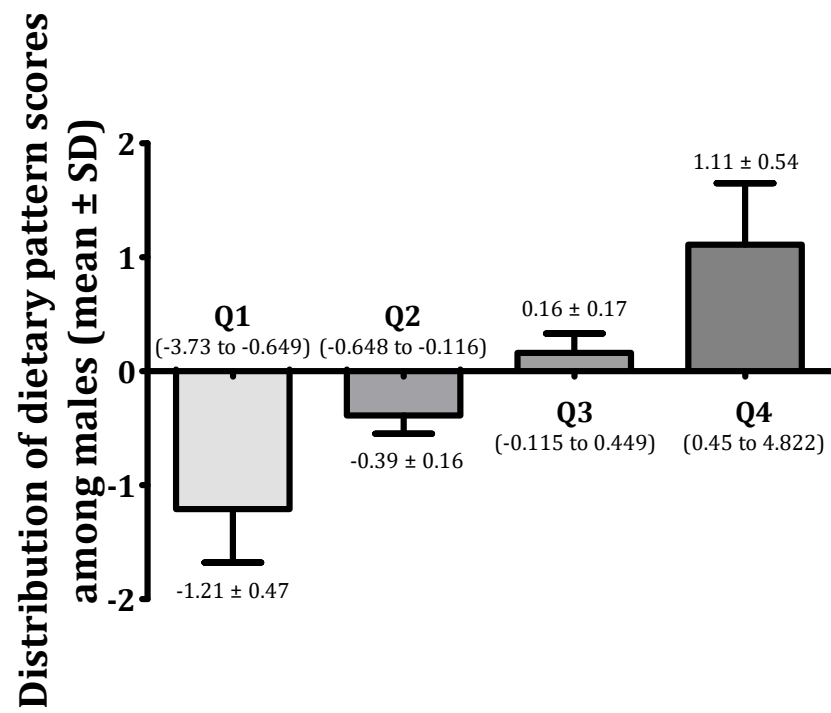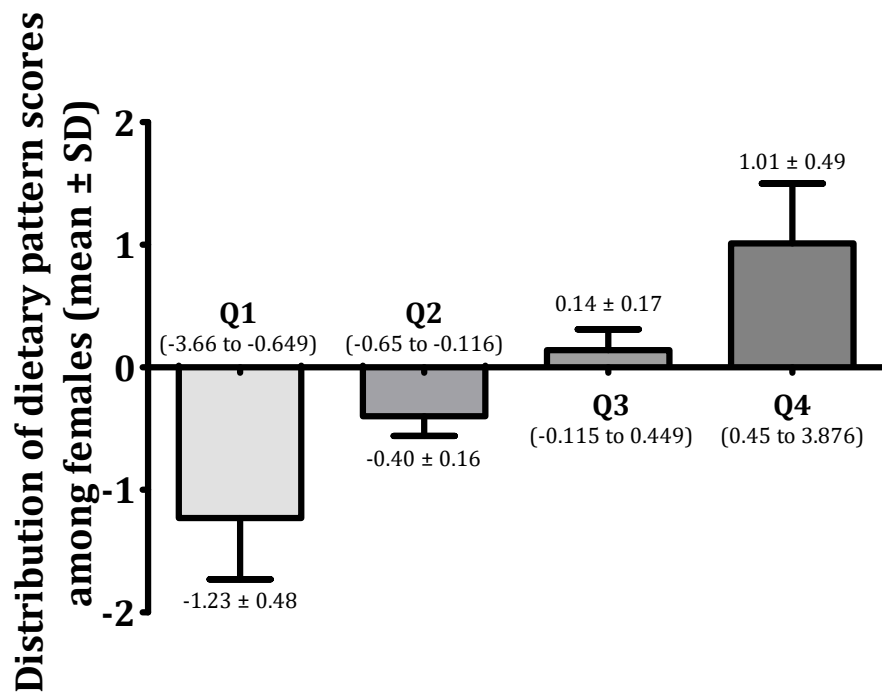

Figure S1. Distribution of dietary pattern scores among males and females.
